# Supplementary material for: Genome-Wide Analysis of U-box E3 Ubiquitin Ligase Family in Response to ABA Treatment in Salvia miltiorrhiza
Source: Front Plant Sci. 2022 Feb 9;13:829447. doi: 10.3389/fpls.2022.829447 (PMC8863962; doi:10.3389/fpls.2022.829447)
Supplement: Supplementary file 10 [file Table_2.XLS]

## Sheet: Sheet1
Table S2. Summary of the characterization of 60 U-box genes in S. miltiorrhiza.
Genomic ID	Gene Name	Localization		Start	End	Sense Strand (+) or Antisense Strand (-)	CDS(bp)	Protein Length (aa)	Class	Theoretical pI	Molecular weight (Da)	Subcellular localization	Intron	Instability Index	Aliphatic Index	Grand Average of Hydropathicity (GRAVY)	Gene Size
SMil_00006546-mRNA-1:cds	SmU-box1	scaffold450		37228	42825	-	3105	1034	Group VI	5.48	117439	Nucleus.	15	48.67	92.04	-0.218	5598
SMil_00026488-mRNA-1:cds	SmU-box2	scaffold7427		13743	17359	+	816	271	Group II	5.82	31160.5	Nucleus.	7	41.54	86.79	-0.517	3617
SMil_00010198-mRNA-1:cds	SmU-box3	scaffold921		39765	41939	+	1971	656	Group III	7.87	73018.7	Nucleus.	2	39.1	107.35	-0.132	2175
SMil_00011273-mRNA-1:cds	SmU-box4	scaffold2262		50790	52838	+	2043	680	Group III	6.88	74025.7	Nucleus.	2	50.41	110.49	0.047	2049
SMil_00027768-mRNA-1:cds	SmU-box5	scaffold8974		2526	8409	-	2463	820	Group III	5.44	88777.4	Nucleus.	5	43.36	96.48	-0.242	5884
SMil_00023864-mRNA-1:cds	SmU-box6	scaffold5296		9297	11672	+	1371	456	Group III	8.26	51554.8	Nucleus.	2	47.09	99.93	-0.312	2376
SMil_00010679-mRNA-1:cds	SmU-box7	scaffold1019		25485	26774	-	1290	429	Group IV	8.88	47811.9	Nucleus.	0	40.11	94.99	-0.122	1290
SMil_00025001-mRNA-1:cds	SmU-box8	scaffold6090		4593	5840	+	1248	415	Group IV	6.18	44874.8	Nucleus.	0	48.39	108.65	0.209	1248
SMil_00009886-mRNA-1:cds	SmU-box9	scaffold871		31718	37307	-	2316	771	Group III	6.15	84687.4	Nucleus.	5	40.31	98.82	-0.254	5590
SMil_00007277-mRNA-1:cds	SmU-box10	scaffold4536		5801	10893	+	2652	883	Group II	5.93	99855.1	Nucleus.	8	52.54	81.11	-0.538	5093
SMil_00014177-mRNA-1:cds	SmU-box11	scaffold1661		60448	62487	+	2040	679	Group III	7.54	74336.1	Nucleus.	0	41.04	106.6	0.015	2040
SMil_00002284-mRNA-1:cds	SmU-box12	scaffold1134		117494	120952	+	2226	741	Group III	5.54	83504.5	Nucleus.	3	42.84	97.03	-0.257	3459
SMil_00006232-mRNA-1:cds	SmU-box13	scaffold420		74469	75614	-	1146	381	Group IV	6.47	41877.6	Nucleus.	0	52.38	105.77	0.06	1146
SMil_00024910-mRNA-1:cds	SmU-box14	scaffold6013		4510	5790	+	1281	426	Group IV	8.47	47743.5	Nucleus.	0	47.12	99.74	-0.086	1281
SMil_00027387-mRNA-1:cds	SmU-box15	scaffold8439		2221	3492	+	1272	423	Group IV	6.09	46433.1	Nucleus.	0	49.69	102.65	0.157	1272
SMil_00011475-mRNA-1:cds	SmU-box16	scaffold1144		16554	18684	-	2166	721	Group III	8.63	78545.8	Nucleus.	2	44.69	100.75	0.015	2131
SMil_00011815-mRNA-1:cds	SmU-box17	scaffold1430		40077	41383	+	1227	408	Group IV	8.81	45523.1	Nucleus.	1	37.7	100.39	-0.074	1307
SMil_00018059-mRNA-1:cds	SmU-box18	scaffold2685		1063	2256	+	1194	397	Group IV	8.8	43898.8	Nucleus.	0	47.09	105.16	-0.051	1194
SMil_00009208-mRNA-1:cds	SmU-box19	scaffold1254		52631	53842	+	1212	403	Group IV	7.92	44495	Nucleus.	0	48.13	101.27	0.033	1212
SMil_00027413-mRNA-1:cds	SmU-box20	scaffold8464		760	1997	+	1239	412	Group IV	8	44894	Nucleus.	1	45.42	110.83	0.208	1238
SMil_00020051-mRNA-1:cds	SmU-box21	scaffold3389		18743	23680	+	1959	652	Group III	6.59	71020.2	Nucleus.	6	46.43	101.33	-0.139	4938
SMil_00019552-mRNA-1:cds	SmU-box22	scaffold3967		19511	26492	+	2400	799	Group II	6.39	89871.7	Nucleus.	9	47.37	88.51	-0.352	6982
SMil_00012879-mRNA-1:cds	SmU-box23	scaffold1375		51104	56159	-	3030	1009	Group IV	5.4	112159	Nucleus.	4	47.7	107.67	-0.063	5056
SMil_00011239-mRNA-1:cds	SmU-box24	scaffold1107		68098	69167	-	1107	368	Group III	6.46	39903.3	Nucleus.	1	46.25	112.09	0.105	1070
SMil_00013167-mRNA-1:cds	SmU-box25	scaffold1438		38955	40980	+	2013	670	Group III	8.4	74299.7	Nucleus.	1	52.88	106.42	0	2026
SMil_00010690-mRNA-1:cds	SmU-box26	scaffold3017		63742	68764	+	2313	770	Group III	5.22	85291.4	Nucleus.	4	48.81	95.75	-0.216	5023
SMil_00021170-mRNA-1:cds	SmU-box27	scaffold3860		27523	31065	+	3000	999	Group IV	5.61	110678	Nucleus.	3	45.86	105.31	-0.034	3543
SMil_00014457-mRNA-1:cds	SmU-box28	scaffold3617		1248	3949	-	1914	637	Group III	5.53	69426.5	Nucleus.	3	46.88	105.67	-0.016	2702
SMil_00006411-mRNA-1:cds	SmU-box29	scaffold437		94665	99028	+	2436	811	Group II	6.64	90435.2	Nucleus.	7	45.03	87.45	-0.302	4364
SMil_00022065-mRNA-1:cds	SmU-box30	scaffold4308		15602	16828	+	1227	408	Group IV	8.53	44153.2	Nucleus.	0	44.63	101.84	0.063	1227
SMil_00009209-mRNA-1:cds	SmU-box31	scaffold1254		61205	62164	-	960	319	Group IV	9.03	34767.5	Nucleus.	0	46.53	103.95	0.047	960
SMil_00016197-mRNA-1:cds	SmU-box32	scaffold4415		28152	29381	+	1230	409	Group IV	8.79	45117.8	Nucleus.	0	44.39	92.81	-0.027	1230
SMil_00015554-mRNA-1:cds	SmU-box33	scaffold4056		24224	25456	-	1233	410	Group IV	9.22	45349.1	Nucleus.	0	42.2	100.68	-0.002	1233
SMil_00011465-mRNA-1:cds	SmU-box34	scaffold2327		27737	33236	-	2205	734	Group II	6.07	82627.1	Nucleus.	9	52.37	86.23	-0.365	5500
SMil_00017326-mRNA-1:cds	SmU-box35	scaffold4179		24121	30665	-	1989	662	Group III	5.36	71491.4	Cytoplasm. Nucleus.	4	34.55	95	-0.26	6545
SMil_00026490-mRNA-1:cds	SmU-box36	scaffold7427		19478	21319	-	888	295	Group III	10.04	32442.3	Nucleus.	2	52.05	76.47	-0.558	1842
SMil_00005717-mRNA-1:cds	SmU-box37	scaffold373		41743	45022	-	2457	818	Group IV	5.29	89817.6	Nucleus.	2	47.76	109.8	0.066	3280
SMil_00024202-mRNA-1:cds	SmU-box38	scaffold5515		10415	16759	-	3789	1262	Group V	5.81	140706	Nucleus.	14	48.25	98.76	-0.153	6345
SMil_00005519-mRNA-1:cds	SmU-box39	scaffold352		71070	75466	+	2445	814	Group IV	5.62	62906.1	Nucleus.	3	45.4	102.44	-0.128	4397
SMil_00021152-mRNA-1:cds	SmU-box40	scaffold3855		4320	10684	-	2397	798	Group II	5.58	88624.8	Cell membrane. Cytoplasm. Nucleus.	8	43.48	85.54	-0.341	6365
SMil_00009419-mRNA-1:cds	SmU-box41	scaffold806		36235	43569	-	4131	1376	Group V	5.94	152922	Nucleus.	15	53.54	88.61	-0.235	7335
SMil_00024913-mRNA-1:cds	SmU-box42	scaffold6016		16250	19528	+	1497	498	Group II	7.09	56637.7	Nucleus.	3	52.05	87.95	-0.394	3279
SMil_00002742-mRNA-1:cds	SmU-box43	scaffold15043		43762	45116	-	1263	420	Group IV	8.1	46384.4	Nucleus.	1	48.46	106.02	0.033	1355
SMil_00009058-mRNA-1:cds	SmU-box44	scaffold759		54984	56321	+	1338	445	Group IV	6.8	49209.4	Nucleus.	0	51.04	108.58	0.11	1338
SMil_00017431-mRNA-1:cds	SmU-box45	scaffold2497		30177	32466	+	1404	467	Group III	5.7	51837.8	Nucleus.	2	35.7	98.61	-0.193	2290
SMil_00016363-mRNA-1:cds	SmU-box46	scaffold2206		18210	18764	+	555	184	Group III	7.74	20026.8	Nucleus.	0	90.19	81.63	-0.202	555
SMil_00006583-mRNA-1:cds	SmU-box47	scaffold452		37042	40200	+	3045	1014	Group IV	5.82	111872	Nucleus.	3	42.09	108.4	-0.01	3159
SMil_00021824-mRNA-1:cds	SmU-box48	scaffold4191		30045	35130	-	2157	718	Group III	5.6	79436.2	Nucleus.	5	43.95	102.28	-0.111	5086
SMil_00029937-mRNA-1:cds	SmU-box49	scaffold15043		4971	6329	+	1347	448	Group IV	7.47	48917.3	Nucleus.	1	46.57	108.53	0.121	1359
SMil_00009245-mRNA-1:cds	SmU-box50	scaffold782		28481	30070	-	1590	529	Group III	7.11	56798.4	Nucleus.	0	51.16	91.76	-0.178	1590
SMil_00012076-mRNA-1:cds	SmU-box51	scaffold2923		46401	48793	+	1872	623	Group III	5.41	69123.7	Nucleus.	3	42.72	103.42	-0.204	2393
SMil_00027469-mRNA-1:cds	SmU-box52	scaffold8553		1295	10626	-	4026	1341	Group IV	6.18	149335	Nucleus.	10	48.38	86.92	-0.391	9332
SMil_00028999-mRNA-1:cds	SmU-box53	scaffold1927		1076	8639	-	1233	410	Group I	5.68	45227.2	Nucleus.	8	61.43	59.27	-0.791	7564
SMil_00016864-mRNA-1:cds	SmU-box54	scaffold3235		20426	21474	+	2148	715	Group III	6.29	78767.1	Nucleus.	1	39.11	103.48	0.077	1049
SMil_00008404-mRNA-1:cds	SmU-box55	scaffold666		32275	39790	-	2055	684	Group V	8.08	77469.3	Nucleus.	12	53.77	78.06	-0.409	7516
SMil_00003995-mRNA-1:cds	SmU-box56	scaffold198		43937	48527	-	1173	390	Group II	5.19	44197.8	Nucleus.	7	54.61	68.72	-0.373	4591
SMil_00016530-mRNA-1:cds	SmU-box57	scaffold5208		10148	15874	-	1788	595	Group V	7.94	65716.3	Cytoplasm. Nucleus.	10	35.29	70.49	-0.56	5727
SMil_00017210-mRNA-1:cds	SmU-box58	scaffold2446		43158	50819	+	2028	675	Group V	6.67	76075	Nucleus.	13	55.87	80.16	-0.443	7662
SMil_00011066-mRNA-1:cds	SmU-box59	scaffold1081		34950	42943	-	1992	663	Group V	6.26	74335.7	Nucleus.	12	59.33	76.33	-0.485	7994
SMil_00026116-mRNA-1:cds	SmU-box60	scaffold7030		42	7810	+	1485	494	Group V	8.41	56329.8	Cell membrane. Nucleus.	15	49.2	59.37	-0.455	7769
