# Supplementary material for: Genome-Wide Analysis of U-box E3 Ubiquitin Ligase Family in Response to ABA Treatment in Salvia miltiorrhiza
Source: Front Plant Sci. 2022 Feb 9;13:829447. doi: 10.3389/fpls.2022.829447 (PMC8863962; doi:10.3389/fpls.2022.829447)
Supplement: Supplementary file 12 [file Table_4.XLS]

## Sheet: Sheet1
Table S4. The FPKM value of U-box E3 genes under ABA treatment.
GeneID	0h	0.5h	1h	2h	4h	8h
SmU-box1	39.99	38.03	37.34	37.37	32.49	34.98
SmU-box2	15.24	32.96	26.94	16.39	12.46	9.89
SmU-box3	18.93	18.19	11.51	9.45	9.73	10.36
SmU-box4	1.17	3.79	8.66	4.86	2.47	2.56
SmU-box5	28.73	29.72	28.81	28.04	24.86	28.05
SmU-box6	28.11	37.15	36.83	25.41	21.08	21.18
SmU-box7	1.79	2.15	2.89	3.6	3.85	1.94
SmU-box8	13.69	34.27	13.89	17.23	20.24	13.09
SmU-box9	11.36	12.57	9.21	7.01	6.62	8.66
SmU-box10	17.12	15.86	9.28	10.65	16.95	14.31
SmU-box11	12.23	21.11	21.25	18.99	12.55	11.47
SmU-box12	1.75	21.45	27.67	12.63	6.63	4.95
SmU-box13	35.16	24.79	13.29	10.58	15.38	16.2
SmU-box14	1.96	11.56	6.32	5.9	2.87	1.58
SmU-box15	1.22	13.66	12.71	23.24	9.34	3.44
SmU-box16	12.41	35.18	34.14	25.72	24.65	21.16
SmU-box17	5.41	74.29	43.23	20.2	10.13	2.66
SmU-box18	12.47	68.13	33.62	27.84	19.25	7.89
SmU-box19	1.24	1.92	1.07	1.17	1.42	1.47
SmU-box20	13.69	34.27	13.89	17.23	20.24	13.09
SmU-box21	68.95	87.86	44.99	38.63	34.72	51.62
SmU-box22	22.63	20.66	16.68	19.66	17.03	18.11
SmU-box23	7.4	10.15	8.81	9.61	6.75	4.26
SmU-box24	42.11	45.9	37.67	40.9	48.86	39.74
SmU-box25	1.75	21.45	27.67	12.63	6.63	4.95
SmU-box26	10.05	8.6	8.52	8.84	6.74	8.86
SmU-box27	7.4	10.15	8.81	9.61	6.75	4.26
SmU-box28	68.95	87.86	44.99	38.63	34.72	51.62
SmU-box29	5.48	5.4	5.26	4.68	10.88	6.13
SmU-box30	15.41	24.76	27.68	41.25	34.24	13.18
SmU-box31	4.42	8.4	9.1	11.51	9.23	10.73
SmU-box32	11.48	31.07	55.41	43.9	26.72	22.19
SmU-box33	48.57	101.12	60.71	17.23	11.1	7.51
SmU-box34	19.55	22.92	32.37	26.83	24.52	13.81
SmU-box35	42.11	45.9	37.67	40.9	48.86	39.74
SmU-box36	24.92	78.73	125.74	50.33	24.44	24.09
SmU-box37	16.42	27.84	28.04	18.3	17.84	15.88
SmU-box38	30.32	26.32	33.24	60.49	39.26	27.34
SmU-box39	27.15	34.78	33.07	26.72	27.89	30.64
SmU-box40	18.8	20.07	18.34	17.69	19.51	27.57
SmU-box41	13.63	11.38	11.44	8.31	12.08	17.23
SmU-box42	17.12	15.86	9.28	10.65	16.95	14.31
SmU-box43	23.88	28.51	16.9	10.62	12.81	15.28
SmU-box44	5.87	7.47	5.61	3.74	4.03	4.87
SmU-box45	4.88	15.6	43.57	28.99	19.75	18.11
SmU-box46	36.83	34.59	24.16	22.68	22.08	29.79
SmU-box47	3.78	7.49	10.41	8.45	10.41	4.31
SmU-box48	12.09	11.81	6.76	4.44	4.99	4.43
SmU-box49	23.88	28.51	16.9	10.62	12.81	15.28
SmU-box50	11.2	10.39	14.91	15.58	15.05	11.19
SmU-box51	18.93	18.19	11.51	9.45	9.73	10.36
SmU-box52	1.86	1.64	1.03	1.67	1.95	1.14
SmU-box53	17.08	16.66	15.31	15.4	15.7	16.53
SmU-box54	26.01	65.91	42.51	32.11	30.57	22.52
SmU-box55	17.94	55.44	82.38	55.65	41.78	37.15
SmU-box56	48.67	42.29	40.76	46.59	50.57	41.26
SmU-box57	21.62	18.13	16.97	14.61	16.97	16.77
SmU-box58	17.94	55.44	82.38	55.65	41.78	37.15
SmU-box59	17.94	55.44	82.38	55.65	41.78	37.15
SmU-box60	38.24	43.68	69.36	89.86	72.18	79.64
