# Supplementary material for: Genome-Wide Analysis of U-box E3 Ubiquitin Ligase Family in Response to ABA Treatment in Salvia miltiorrhiza
Source: Front Plant Sci. 2022 Feb 9;13:829447. doi: 10.3389/fpls.2022.829447 (PMC8863962; doi:10.3389/fpls.2022.829447)
Supplement: Supplementary file 13 [file Table_5.XLS]

## Sheet: Sheet1
Table S5. Analysis of correlation of all UBE3 genes between phenolic acids or tanshinone biosynthetic genes.
U-box	Enzyme	Correction	P-value	Pathway
SmU-box15	TAT	0.915372	0.0104399	Phenolic acids
SmU-box40	4CL	-0.920192	0.00929981	Phenolic acids
SmU-box41	4CL	-0.902483	0.0138006	Phenolic acids
SmU-box1	C4H	-0.898745	0.0148597	Phenolic acids
SmU-box33	C4H	-0.859266	0.0283153	Phenolic acids
SmU-box48	C4H	-0.812144	0.0496202	Phenolic acids
SmU-box5	C4H	-0.870269	0.0241536	Phenolic acids
SmU-box6	C4H	-0.873052	0.0231509	Phenolic acids
SmU-box9	C4H	-0.845376	0.0340146	Phenolic acids
SmU-box23	CYP98A14	-0.843258	0.0349269	Phenolic acids
SmU-box27	CYP98A14	-0.843258	0.0349269	Phenolic acids
SmU-box6	CYP98A14	-0.884223	0.0193304	Phenolic acids
SmU-box3	HPPR	0.861849	0.0273103	Phenolic acids
SmU-box43	HPPR	0.880212	0.0206643	Phenolic acids
SmU-box48	HPPR	0.881619	0.0201917	Phenolic acids
SmU-box49	HPPR	0.880212	0.0206643	Phenolic acids
SmU-box51	HPPR	0.861849	0.0273103	Phenolic acids
SmU-box52	HPPR	0.859611	0.02818	Phenolic acids
SmU-box60	HPPR	-0.942512	0.00486235	Phenolic acids
SmU-box13	PAL	-0.910425	0.011676	Phenolic acids
SmU-box21	PAL	-0.858897	0.0284604	Phenolic acids
SmU-box28	PAL	-0.858897	0.0284604	Phenolic acids
SmU-box3	PAL	-0.960233	0.00234067	Phenolic acids
SmU-box31	PAL	0.861117	0.0275932	Phenolic acids
SmU-box43	PAL	-0.930076	0.00716314	Phenolic acids
SmU-box44	PAL	-0.856612	0.0293663	Phenolic acids
SmU-box46	PAL	-0.911754	0.0113375	Phenolic acids
SmU-box48	PAL	-0.948991	0.00383652	Phenolic acids
SmU-box49	PAL	-0.930076	0.00716314	Phenolic acids
SmU-box51	PAL	-0.960233	0.00234067	Phenolic acids
SmU-box52	PAL	-0.971578	0.00120023	Phenolic acids
SmU-box57	PAL	-0.897079	0.0153439	Phenolic acids
SmU-box60	PAL	0.954418	0.00306924	Phenolic acids
SmU-box9	PAL	-0.939357	0.00540493	Phenolic acids
SmU-box33	RAS	-0.841226	0.0358123	Phenolic acids
SmU-box6	RAS	-0.916707	0.0101177	Phenolic acids
SmU-box30	TAT	0.943111	0.00476247	Phenolic acids
SmU-box38	TAT	0.881145	0.0203501	Phenolic acids
SmU-box41	TAT	-0.840074	0.0363193	Phenolic acids
SmU-box50	TAT	0.864069	0.0264602	Phenolic acids
SmU-box52	TAT	-0.813601	0.0488785	Phenolic acids
SmU-box53	TAT	-0.886009	0.0187502	Phenolic acids
SmU-box7	TAT	0.842911	0.0350772	Phenolic acids
SmU-box1	CPS	0.847327	0.0331844	Tanshinones
SmU-box6	CPS	0.853405	0.03066	Tanshinones
SmU-box1	CYP76AH1	0.82563	0.0429566	Tanshinones
SmU-box22	CYP76AH1	0.888095	0.0180836	Tanshinones
SmU-box3	CYP76AH1	0.869848	0.0243069	Tanshinones
SmU-box48	CYP76AH1	0.882045	0.0200496	Tanshinones
SmU-box51	CYP76AH1	0.869848	0.0243069	Tanshinones
SmU-box23	DXR	0.846662	0.033466	Tanshinones
SmU-box27	DXR	0.846662	0.033466	Tanshinones
SmU-box40	DXR	-0.907712	0.0123826	Tanshinones
SmU-box34	DXS2	0.984966	0.000337345	Tanshinones
SmU-box40	DXS2	-0.859203	0.0283403	Tanshinones
SmU-box13	GGPPS	-0.868844	0.0246747	Tanshinones
SmU-box15	GGPPS	0.895988	0.0156651	Tanshinones
SmU-box19	GGPPS	0.834837	0.0386654	Tanshinones
SmU-box30	GGPPS	0.902602	0.0137675	Tanshinones
SmU-box32	GGPPS	0.833022	0.0394945	Tanshinones
SmU-box46	GGPPS	-0.877438	0.0216117	Tanshinones
SmU-box50	GGPPS	0.86217	0.0271864	Tanshinones
SmU-box52	GGPPS	-0.886152	0.0187043	Tanshinones
SmU-box53	GGPPS	-0.94199	0.0049502	Tanshinones
SmU-box57	GGPPS	-0.874052	0.0227955	Tanshinones
SmU-box7	GGPPS	0.847876	0.0329525	Tanshinones
SmU-box23	KSL	0.871276	0.0237882	Tanshinones
SmU-box27	KSL	0.871276	0.0237882	Tanshinones
SmU-box40	KSL	-0.931602	0.00685748	Tanshinones
SmU-box41	KSL	-0.828825	0.0414435	Tanshinones
